# Supplementary material
Source: publisher site journal article supplement (https://www.spandidos-publications.com/3922/downloadSupplementary)

Figure S1. Comparison of the effect of paclitaxel on breast cancer cell lines and primary breast cancer cells. MDA-MB-231, HCC1937, MBCDF and MBCDF-D5 breast cancer cells were treated with increasing doses of paclitaxel. Cell viability was evaluated by crystal violet assay 48 h after treatment.

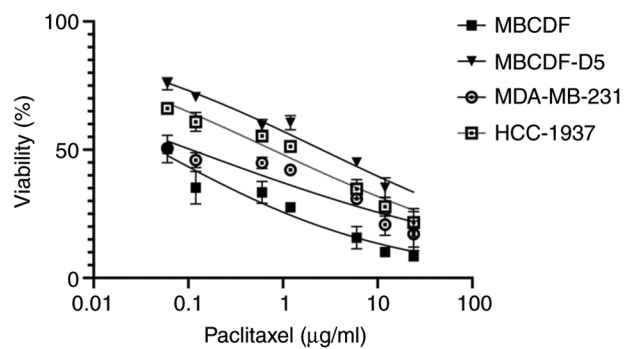

Supplement: Supplementary file 1 [file downloadSupplementary]
